# Supplementary material for: Selective tumor antigen vaccine delivery to human CD169+ antigen-presenting cells using ganglioside-liposomes
Source: PubMed Central journal article supplement — Proc Natl Acad Sci U S A. 2020 Oct 16;117(44):27528–39. doi: 10.1073/pnas.2006186117 (PMC7959579; doi:10.1073/pnas.2006186117), 2020-10-16
Supplement: pnas.2006186117.sapp.pdf [file pnas.2006186117.sapp.pdf]

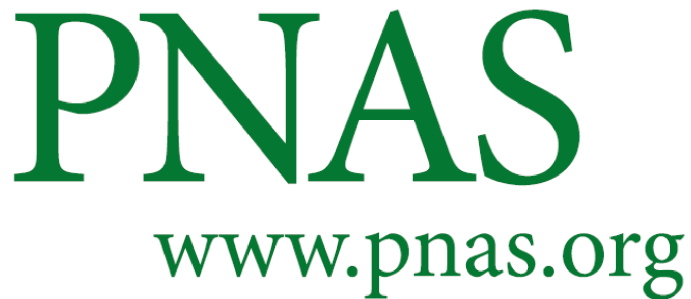

**Supplementary Information for**

Selective tumor antigen vaccine delivery to human CD169<sup>+</sup> antigen presenting cells using ganglioside-liposomes.

Alsya J. Affandi, Joanna Grabowska, Katarzyna Olesek, Miguel Lopez Venegas, Arnaud Barbaria, Ernesto Rodríguez, Patrick P.G. Mulder, Helen J. Pijffers, Martino Ambrosini, Hakan Kalay, Tom O'Toole, Eline S. Zwart, Geert Kazemier, Kamran Nazmi, Floris J. Bikker, Johannes Stöckl, Alfons J.M. van den Eertwegh, Tanja D. de Gruijl, Gert Storm, Yvette van Kooyk, Joke M.M. den Haan\*

\* Dr. Joke den Haan

**Email:** [j.denhaan@amsterdamumc.nl](mailto:j.denhaan@amsterdamumc.nl)

**This PDF file includes:**

Tables S1 to S2

Figures S1 to S6

## Supplementary Tables

**Table S1**

| Liposome | Mean diameter<br>(nm) $\pm$ S.D. ( $n=2$ ) | PDI (0-1) $\pm$<br>S.D. ( $n=2$ ) | Zeta potential (mV) |
|----------|--------------------------------------------|-----------------------------------|---------------------|
| Control  | 159 $\pm$ 1                                | 0.11 $\pm$ 0.02                   | -54.1               |
| GM3      | 164 $\pm$ 1                                | 0.13 $\pm$ 0.03                   | -51.8               |
| GD3      | 176 $\pm$ 8                                | 0.09 $\pm$ 0.08                   | -53.5               |
| GM1      | 170 $\pm$ 0                                | 0.1 $\pm$ 0.01                    | -56.8               |
| GD1a     | 177 $\pm$ 0                                | 0.1 $\pm$ 0.02                    | -51.2               |
| GT1b     | 168 $\pm$ 1                                | 0.1 $\pm$ 0.02                    | -52.2               |

Physical properties of liposomes determined by dynamic light scattering. PDI: polydispersity index

**Table S2**

| Antigen      | Fluorochrome | Clone   | Company     | Dilution |
|--------------|--------------|---------|-------------|----------|
| CD169        | PE           | 7-239   | BD          | 1/50     |
| CD123        | PE-Dazzle594 | 6H6     | Biolegend   | 1/50     |
| CD56         | PE-Dazzle594 | QA17A16 | Biolegend   | 1/100    |
| CD3          | PE-Cy5       | UCHT1   | BD          | 1/100    |
| CD19         | PE-Cy5       | B159    | BD          | 1/50     |
| CD56         | PE-Cy5       | HIB19   | BD          | 1/50     |
| CD141        | PE-Cy7       | M80     | Biolegend   | 1/50     |
| CD163        | BV421        | GHI/61  | Biolegend   | 1/100    |
| CD8          | BV421        | RPA-T8  | BD          | 1/100    |
| CD3          | BV480        | UCHT1   | BD          | 1/100    |
| CD14         | BV605        | M5E2    | Biolegend   | 1/100    |
| CD11c        | BV650        | B-ly6   | BD          | 1/100    |
| HLA-DR       | BV711        | L243    | Biolegend   | 1/50     |
| CD16         | BV786        | 3G8     | Biolegend   | 1/100    |
| CD4          | BV786        | RPA-T4  | Biolegend   | 1/100    |
| Siglec-6     | AF700        | 767329  | R&D         | 1/50     |
| Axl          | AF488        | 108724R | R&D         | 1/50     |
| CD19         | FITC         | LT19    | Immunotools | 1/100    |
| CD1c         | PerCP-eF710  | L161    | eBioscience | 1/50     |
| CD16         | PerCP-Cy5.5  | 3G8     | Biolegend   | 1/100    |
| TNF $\alpha$ | BV750        | MAb11   | BD          | 1/50     |

# Supplementary Figures

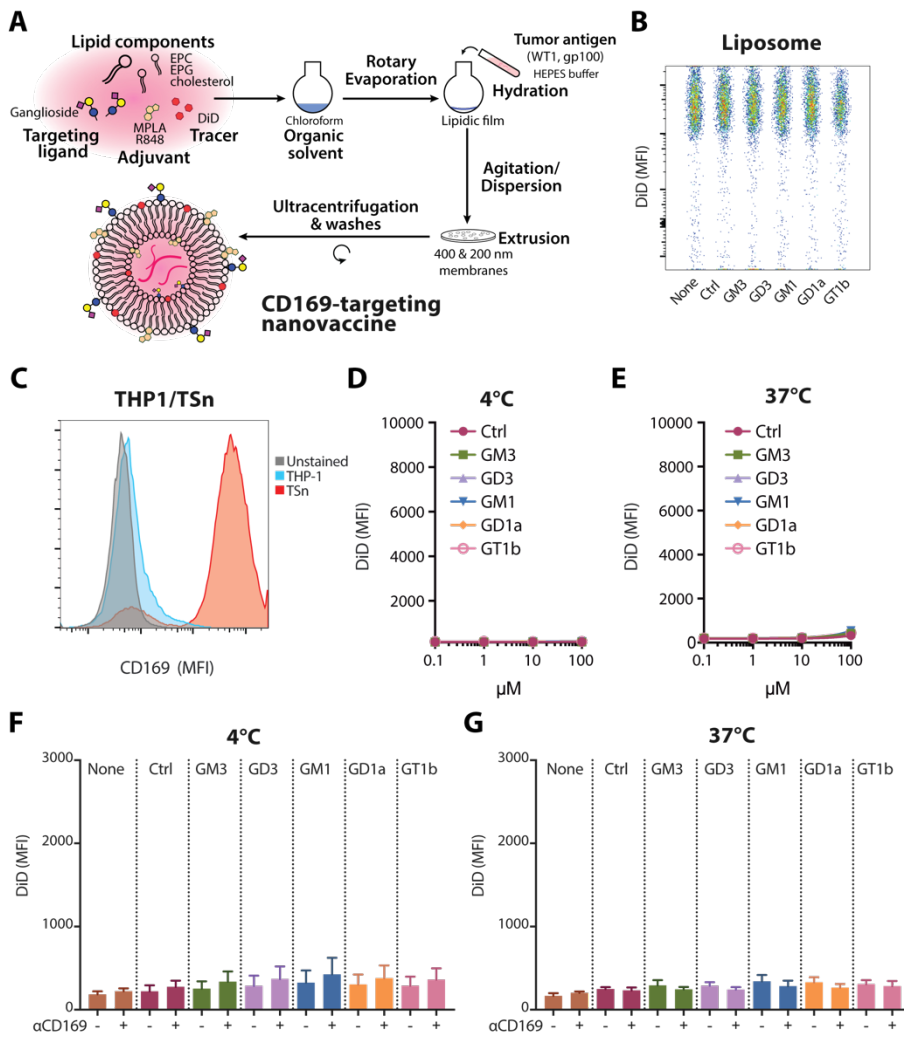

**Figure S1. Ganglioside-liposomes specifically bind to and are taken up via CD169.** (A) Schematic overview of the production of ganglioside-liposomes containing cancer antigens. (B) Liposomes containing gangliosides GM3, GD3, GM1, GD1a, or GT1b showed no differences in DiD-tracer intensity as measured by flow cytometry. (C) The expression of CD169 in THP-1 cells or CD169-overexpressing TSn cells shown by flow cytometry. (D-G) DiD-labeled ganglioside-liposomes were incubated with THP-1 cells and binding at 4°C or uptake at 37°C were determined by flow cytometry. (D,E) Binding or uptake of ganglioside-liposomes at different concentrations from one representative experiment out of two is shown. (F,G) THP-1 cells were pre-incubated with anti-CD169 blocking antibody at 4°C for 15 min prior to ganglioside-liposomes binding or uptake. Data are mean ± SEM from three independent experiments.

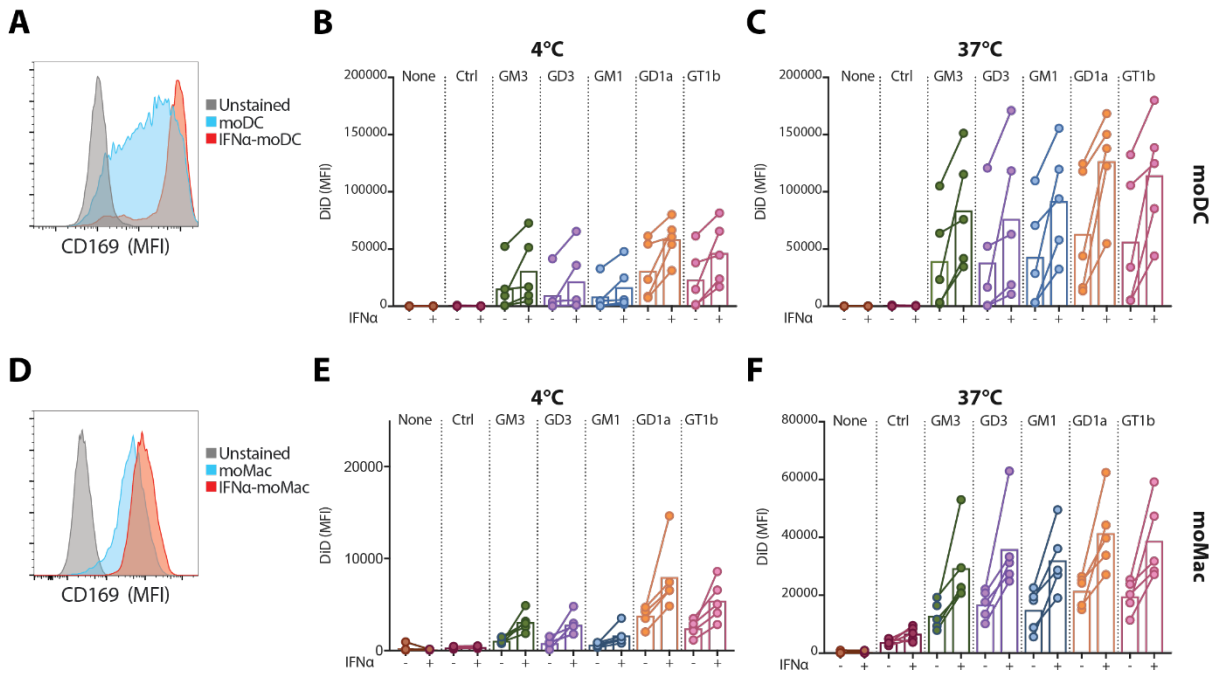

**Figure S2. IFN-I enhances ganglioside-liposome binding and uptake by monocyte-derived dendritic cells (moDCs) and monocyte-derived macrophages (moMacs).** (A-C) moDCs and (D-F) moMacs were incubated with DiD-labeled ganglioside-liposomes and binding (B,E) and uptake (C,F) was determined by flow cytometry. Means (bars) and values from each donor are shown ( $n = 4-5$ ). When indicated, cells were treated for 48 h with recombinant human IFN $\alpha$ .

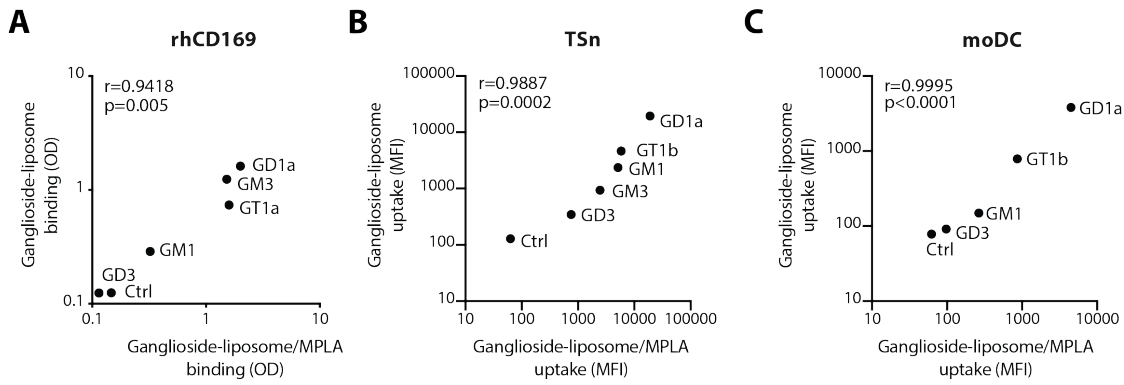

**Figure S3. TLR-ligand incorporation does not interfere with ganglioside-liposome binding to CD169 and uptake by CD169-expressing cells.** Gangliosides GM3, GD3, GM1, GD1a, and GT1b, were incorporated into liposomes and binding to CD169 was determined by (A) recombinant-CD169 ELISA or (B,C) cell-based flow cytometry. (B) Ganglioside-liposomes with or without MPLA-incorporation were coated onto plate, fixed and incubated with recombinant human CD169-6x His to determine binding using ELISA. (B) TSn and (C) monocyte-derived dendritic cells (moDCs) were incubated with DiD-labeled ganglioside-liposomes or MPLA-incorporated ganglioside-liposomes and uptake was evaluated by flow cytometry. Pearson correlation was performed to show correlation.

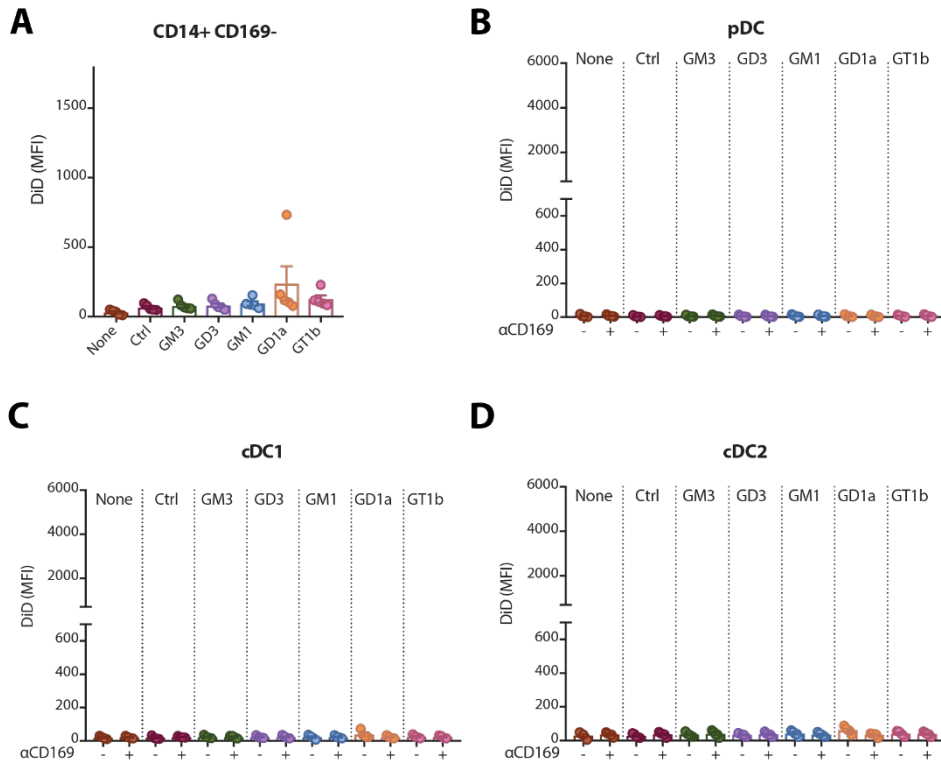

**Figure S4. Ganglioside-liposomes do not target CD169<sup>-</sup> monocytes or CD169<sup>-</sup> dendritic cells.** (A) Uptake of DiD-labeled ganglioside-liposomes by (A) CD14<sup>+</sup> CD169<sup>-</sup> monocytes, (B) plasmacytoid DCs (pDCs), (C) conventional DC1 (cDC1), and (D) conventional DC2 (cDC2) as measured by flow cytometry. When indicated, cells were pre-incubated with anti-CD169 blocking antibody at 4°C for 15 min prior to liposomes uptake. Data are mean ± SEM from five donors.

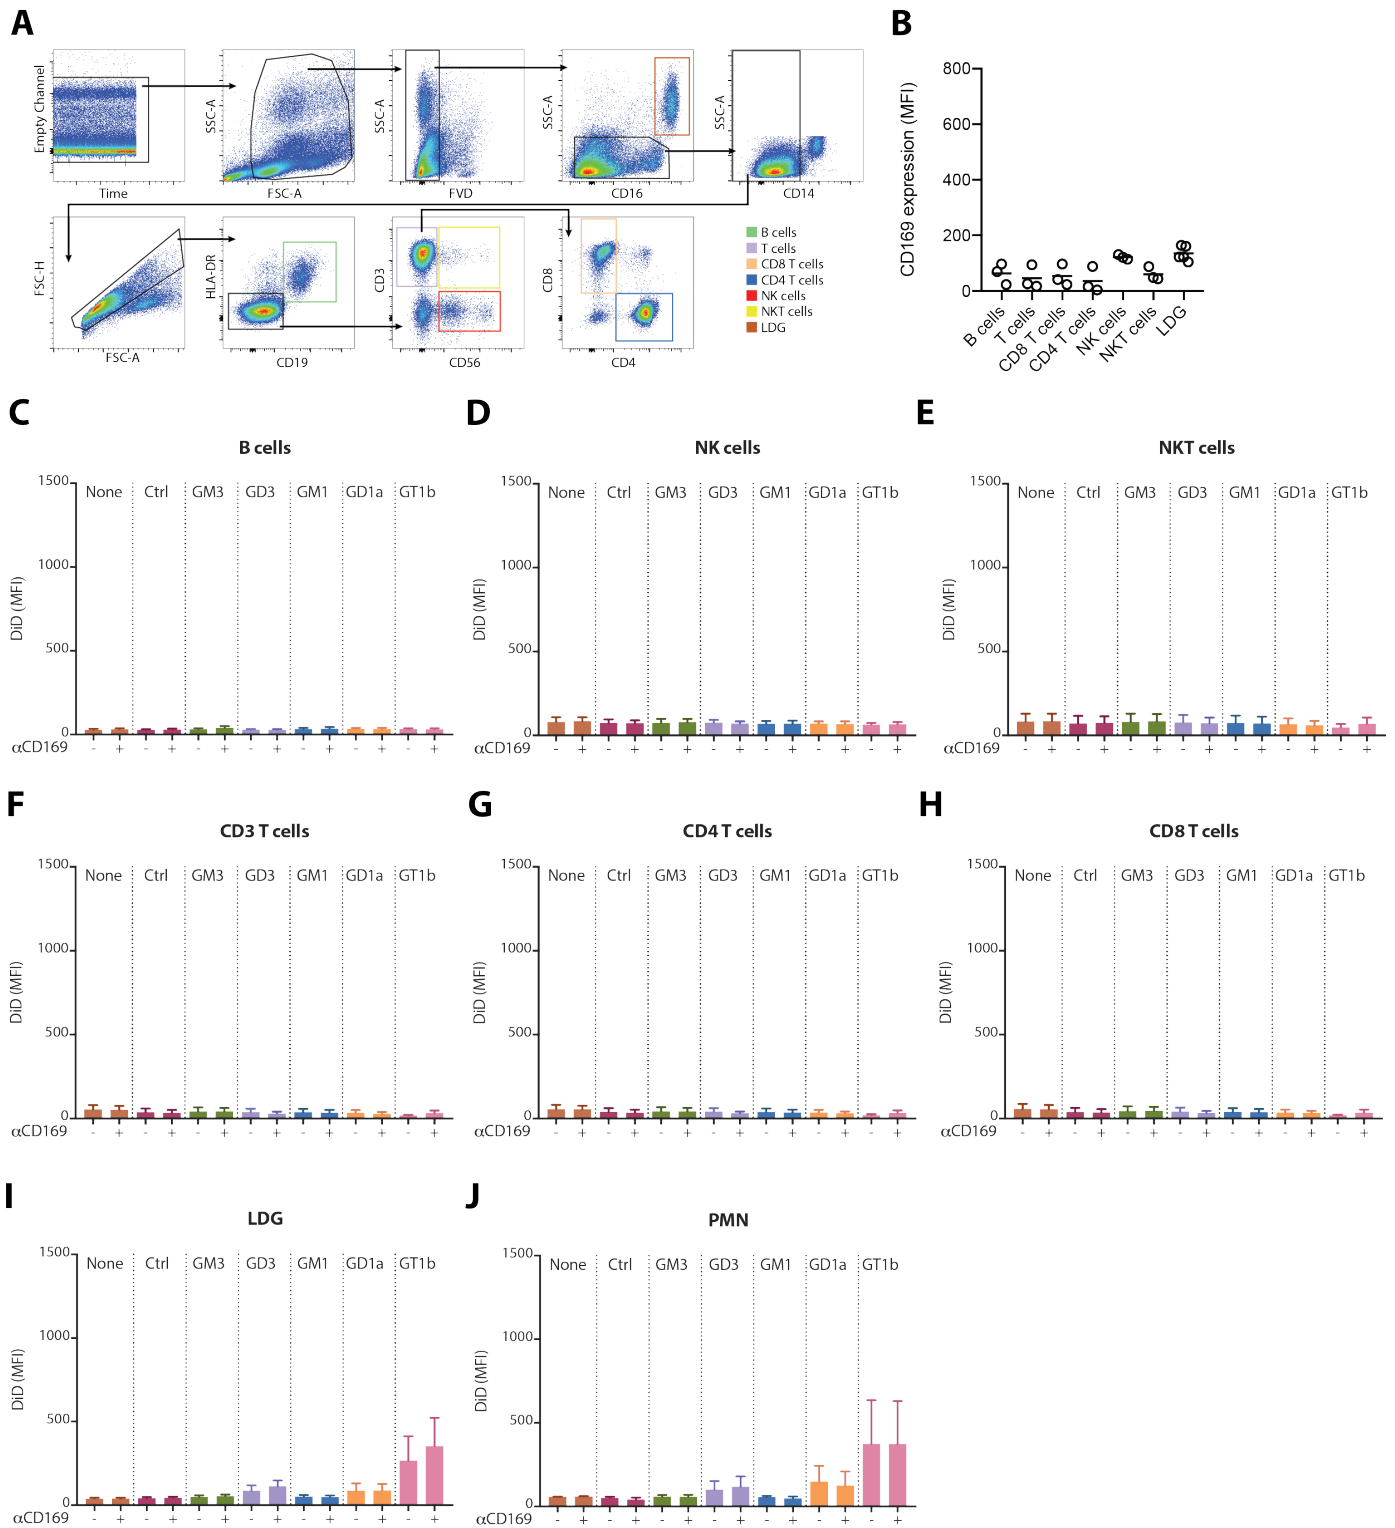

**Figure S5. Ganglioside-liposomes do not target human lymphocytes or granulocytes. (A)** Gating strategy identifies lymphocyte subsets and granulocytes after density gradient centrifugation of peripheral blood mononuclear cells. **(B)** The expression of CD169 as determined by flow cytometry is shown. Means and value of each donor are shown ( $n = 3-4$ ). **(C-J)** Uptake of DiD-labeled ganglioside-liposomes on different **(C)** B cells, **(D)** NK cells, **(E)** NKT cells, **(F)** total T cells, **(G)** CD4<sup>+</sup> T cells, **(H)** CD8<sup>+</sup> T cells, **(I)** low-density granulocytes (LDG), and **(J)** normal-density polymorphonuclear cells (PMN) as measured by flow cytometry. When indicated, cells were pre-incubated with anti-CD169 blocking antibody at 4°C for 15 min prior to liposomes uptake. Data are mean  $\pm$  SEM from three to four donors.

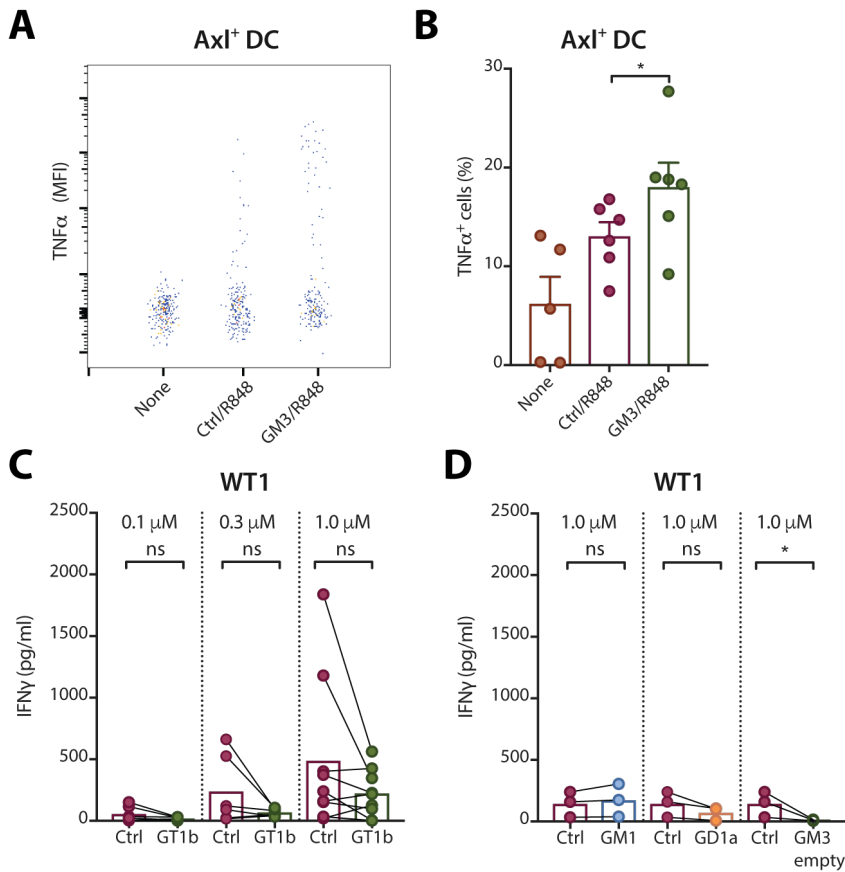

**Figure S6. Ganglioside-liposomes activate human Axl<sup>+</sup> DCs and GM1, GD1a, GT1b liposomes do not result in stimulation of CD8<sup>+</sup> T cells.** (A-B) PBMCs were incubated with 0.1  $\mu$ M R848-containing ganglioside-liposomes at 37°C for 45 min, washed, and cultured for four hours in complete medium, with the addition of brefeldin-A for the final three hours. TNF $\alpha$  production by Axl<sup>+</sup> DCs was measured by intracellular flow cytometry, gated on Axl<sup>+</sup> Siglec6<sup>+</sup> HLA-DR<sup>+</sup> Lin(CD3/CD19/CD56/CD14/CD16)<sup>-</sup> cells, (A) representative plot from one donor and (B) quantification are shown. Data are mean  $\pm$  SEM from 5-6 donors. (C-D) After (CD3/CD14/CD16/CD19/CD56) lineage depletion, enriched DCs were incubated with ganglioside/WT1/R848 liposome or control liposomes at 37°C, washed, and WT1-specific CD8<sup>+</sup> T cells were added. GM3 empty contained no WT1 peptide. IFN $\gamma$  secretion after 24h was determined by ELISA. Data are mean from three to six donors. Paired t-test was used for analysis. \* P < 0.05, \*\*\* P < 0.001, ns not significant.
